# Supplementary material for: Nitrophenyl derivatives of pyrrole 2,5-diamides: structural behaviour, anion binding and colour change signalled deprotonationElectronic supplementary information (ESI) available: 1H NMR, 13C NMR and mass spectra for compounds 2 and 3, NMR anion titration profiles in DMSO-d6–0.5% water. See http://www.rsc.org/suppdata/ob/b2/b210848h/
Source: Royal Society of Chemistry journal article supplement (doi:10.1039/b210848h), 2003-01-28
Supplement: b210848h.pdf [file b210848h.pdf]

# Supplementary Material (ESI) for Organic and Biomolecular Chemistry  
 # This journal is © The Royal Society of Chemistry 2003

## Nitrophenylamide derivatives of pyrrole 2,5-diamides: structural behaviour, anion binding and colour change signaled deprotonation

Salvatore Camiolo, Philip A. Gale,\* Michael B. Hursthouse and Mark E. Light  
 Department of Chemistry, University of Southampton, Southampton, SO17 1BJ, UK.

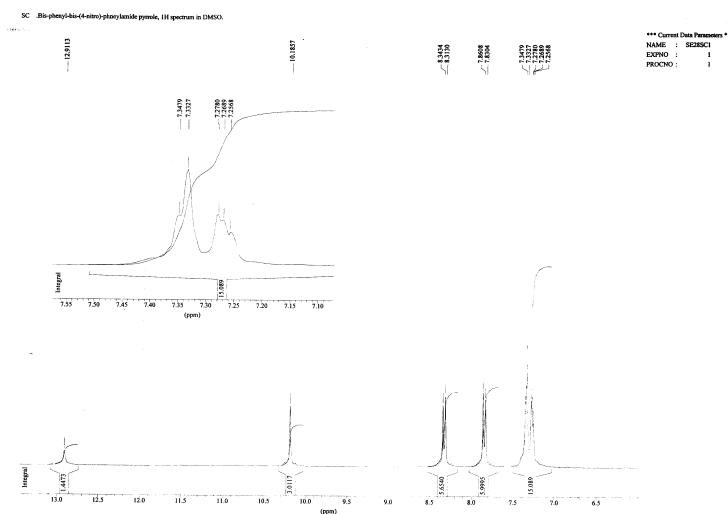

Figure S1  $^1\text{H}$  NMR of compound **2** in  $\text{DMSO-d}_6$

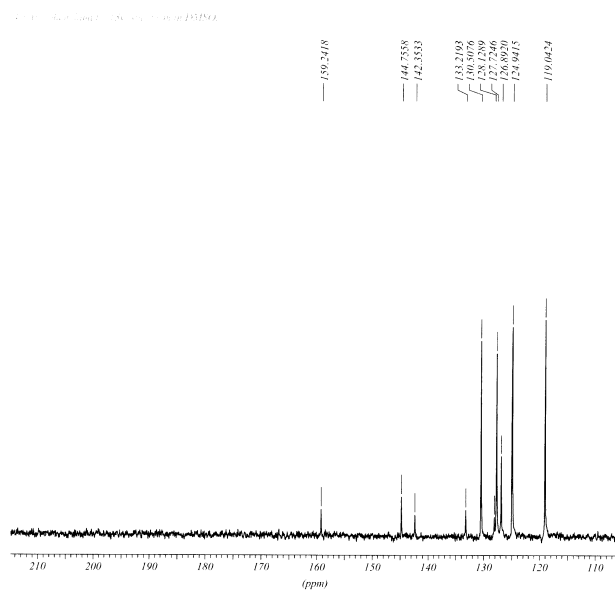

Figure S2  $^{13}\text{C}$  NMR of compound **2** in  $\text{DMSO-d}_6$

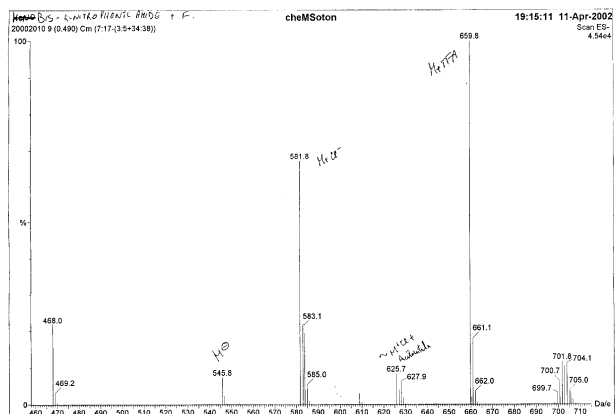

**Figure S3** Negative Electrospray of compound **2** in the presence of TBAF

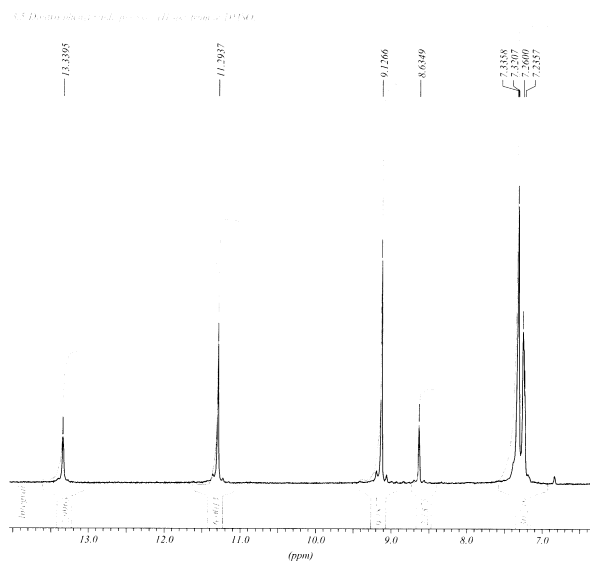

**Figure S4** <sup>1</sup>H NMR of compound **3** in DMSO-d<sub>6</sub>

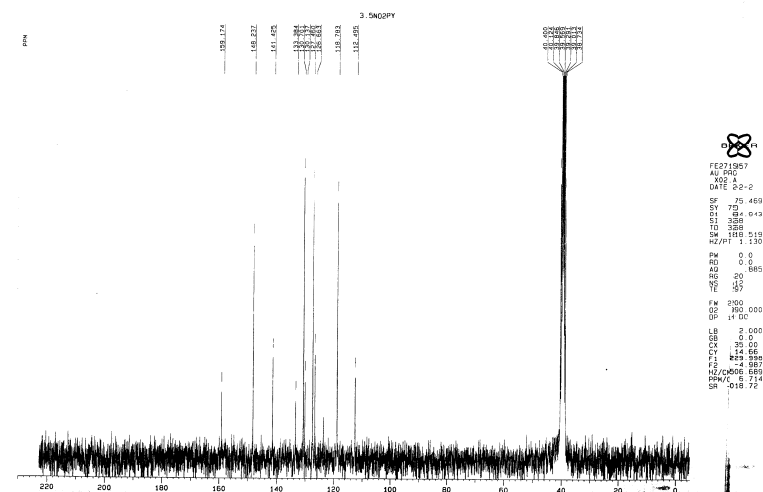

**Figure S5**  $^{13}\text{C}$  NMR of compound **3** in  $\text{DMSO-d}_6$

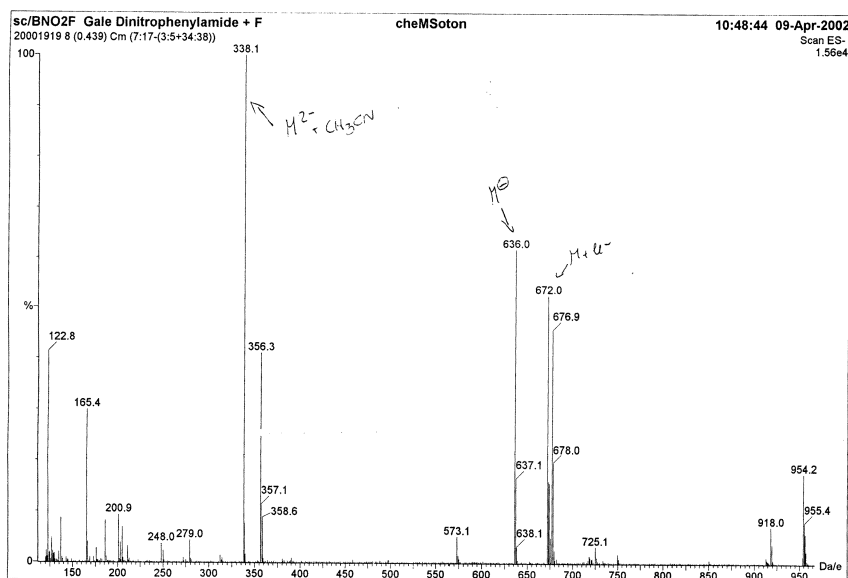

**Figure S6** Negative electrospray of compound **3** in the presence of  $\text{TBAF}^-$ . Mass and UV/Vis spectroscopy support the idea that deprotonation may compete with the anion coordination process even though the pyrrole does not carry electron withdrawing groups. Negative electrospray mass spectrometry analysis carried out on receptor **3** in the presence of a variety of anionic species such as fluoride, chloride, benzoate and dihydrogenphosphate, showed that the  $\text{M}^-$  peak of the receptor is always present. However in the presence of an excess of fluoride the  $\text{M}^{2-}$  species was also observed.

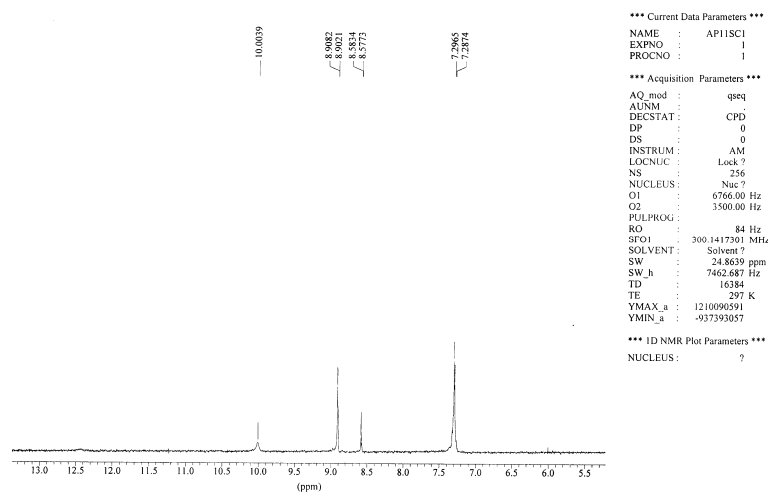

**Figure S7**  $^1\text{H}$  NMR spectrum of compound **3** in  $\text{CD}_3\text{CN}$  (sparingly soluble)

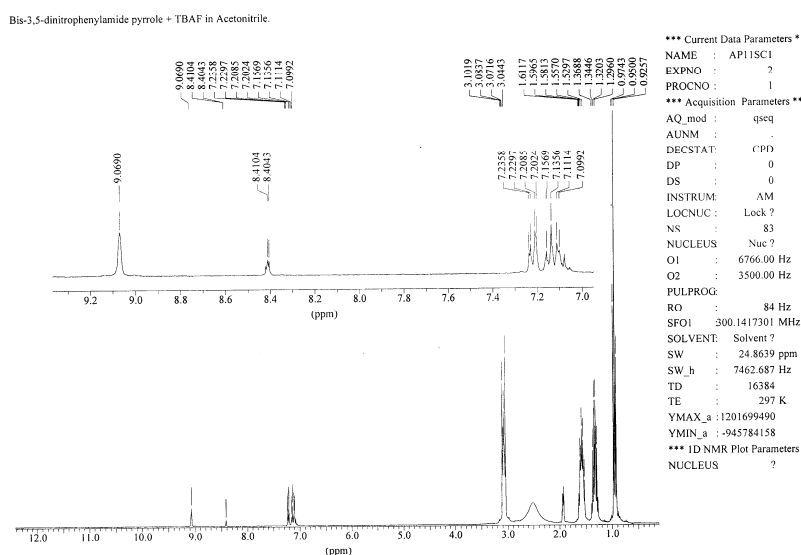

**Figure S8**  $^1\text{H}$  NMR spectrum of compound **3** in  $\text{CD}_3\text{CN}$  in the presence of TBAF

**4-nitro-phenylamide pyrrole + TBAF in DMSO (0.5% water). Based on the phenyl CH resonance shift**  
 $K_1 = 1.24491E+03 \pm 1.135E+02$  (10.8%)

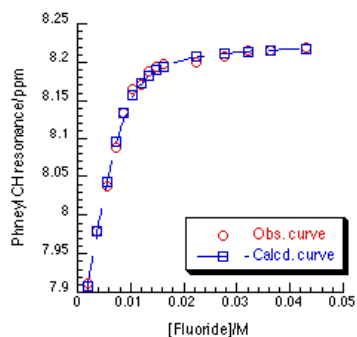

**Titration of 4-nitro-phenylamide pyrrole with TBACl in DMSO (0.5%)**  
 $K_1 = 3.91757E+01 \pm 1.766E+00$  (4.5%)

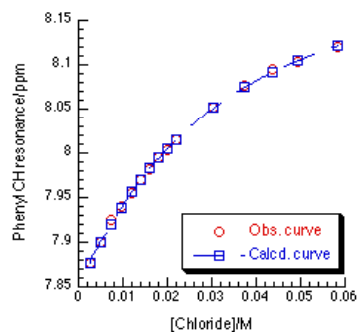

**4-nitro phenylamide pyrrole with H2PO4 in DMSO (0.5% water)**

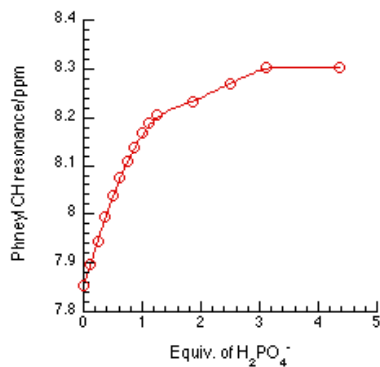

**Titration of 4-nitro-phenylamide pyrrole with TBA Benzoate in DMSO (0.5% water).**  
 $K_1 = 4.15043E+03 \pm 2.244E+02$  (5.4%)

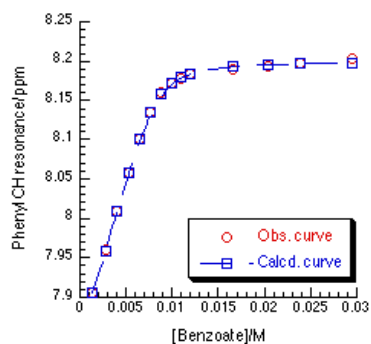

**Figure S9**  $^1\text{H}$  NMR titration curves with compound **2** and various anionic guests in DMSO- $d_6$ /0.5% water

**Bis-3,5-Dinitrophenylamide pyrrole with TBACl  
in DMSO (0.5% water).**  
K1 = 5.28118E+01 ± 1.981E+00 (3.7%)

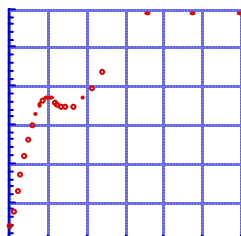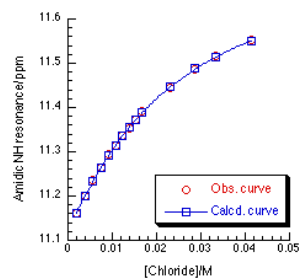

**Titration of Bis-dinitrophenylamide pyrrole with  
TBA Benzoate in DMSO (0.5% water)., based on the  
shift of the aromatic protons.**  
K1 = 4.21426E+03 ± 1.616E+02 (3.8%)

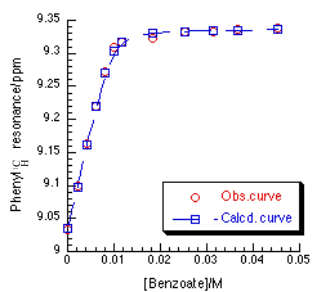

**3,5-dinitro phenylamide pyrrole  
with TBA Benzoate in DMSO (0.5% water).  
Based on the shift of the aromatic CH proton**

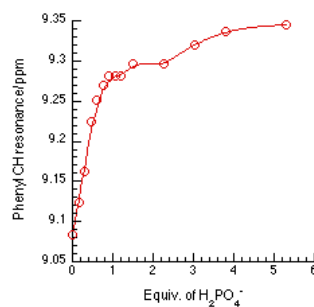

**Figure S10** <sup>1</sup>H NMR titration curves with compound **3** and various anionic guests in DMSO-*d*<sub>6</sub>/0.5% water.
